# Supplementary material
Source: PubMed Central journal article supplement (PMC4586079)
Supplement: NIHMS677296-supplement.pdf [file NIHMS677296-supplement.pdf]

## ITEM S1. Detailed description of Class I and II safety events

| Class I Events                                       | Responding "yes" to "In the past 12 months, have you had any of the following problems":                                                                                                                                           |
|------------------------------------------------------|------------------------------------------------------------------------------------------------------------------------------------------------------------------------------------------------------------------------------------|
| Hypoglycemia <sup>1</sup>                            | "Nervousness, sweating, trembling, weakness, palpitations, and/or confusion with a blood sugar less than 70 (mg/dL) by finger stick or blood test, that improved with glucose tablets, juice, or other substance with sugar in it" |
| Hyperkalemia requiring a change <sup>2</sup>         | "High potassium blood level requiring a change in medication, change in diet, and/or required you to take a prescription of kayexelate or polystyrene (dark brown fluid prescribed to decrease potassium)"                         |
| Falling/Severe Dizziness <sup>3</sup>                | "Falling" or "Dizziness when standing up to the point that you might fall"                                                                                                                                                         |
| Bleeding <sup>4</sup>                                | "Bleeding"                                                                                                                                                                                                                         |
| Angioedema <sup>5</sup>                              | "Facial, tongue, and/or throat swelling"                                                                                                                                                                                           |
| Confusion or unable to think clearly <sup>6</sup>    | "Confusion or unable to think clearly"                                                                                                                                                                                             |
| Nausea, vomiting and/or diarrhea <sup>7</sup>        | "Nausea, vomiting, and/or diarrhea"                                                                                                                                                                                                |
| New or worsening ankle swelling (edema) <sup>8</sup> | "New or worsening ankle swelling"                                                                                                                                                                                                  |
| Muscle weakness or muscle cramps <sup>9</sup>        | "Muscle weakness or muscle cramps"                                                                                                                                                                                                 |
| Skin rash <sup>10</sup>                              | "Skin rash"                                                                                                                                                                                                                        |
| Class II Events                                      | Clinical measurements                                                                                                                                                                                                              |
| Hyperkalemia <sup>11</sup>                           | Potassium > 5.5 mEq/L                                                                                                                                                                                                              |
| Hypokalemia <sup>12</sup>                            | Potassium < 3.5 mEq/L                                                                                                                                                                                                              |
| Hyperglycemia <sup>13</sup>                          | Glucose > 250 mg/dL                                                                                                                                                                                                                |
| Hypoglycemia <sup>14</sup>                           | Glucose < 70 mg/dL                                                                                                                                                                                                                 |
| Low Hemoglobin <sup>15</sup>                         | Hemoglobin < 8.5 g/dL                                                                                                                                                                                                              |
| High Hemoglobin <sup>16</sup>                        | Hemoglobin > 13.5 g/dL                                                                                                                                                                                                             |
| Low Pulse <sup>17</sup>                              | Pulse < 50 bpm                                                                                                                                                                                                                     |
| Low Systolic Blood Pressure (SBP) <sup>18</sup>      | SBP < 90 mmHg                                                                                                                                                                                                                      |
| Change in SBP <sup>19</sup>                          | Change between sitting and standing SBP > 20 mmHg                                                                                                                                                                                  |

<sup>1</sup>antidiabetic insulin, antidiabetic non-insulin inj, antidiabetic non-insulin oral

<sup>2</sup>raas-blocker, diuretic k-sparing, NSAID

<sup>3</sup>raas-blocker, beta-blocker, diuretic non k-sparing, diuretic k-sparing, ca-channel blocker, central antihypertensive, antianginal, other antihypertensive

<sup>4</sup>salicylate, warfarin

<sup>5</sup>ACE inhibitors

<sup>6</sup>analgesic opiate, tramadol

<sup>7</sup>NSAID, colchicine, ferrous sulfate, ferrous gluconate

<sup>8</sup>ca-channel blocker, pioglitazone, other antihypertensive

<sup>9</sup>cholesterol statin

<sup>10</sup>any drug

<sup>11</sup>raas-blocker, diuretic k-sparing, NSAID

<sup>12</sup>diuretic non k-sparing

<sup>13</sup>none

<sup>14</sup>antidiabetic insulin, antidiabetic non-insulin inj, antidiabetic non-insulin oral

<sup>15</sup>not on hematopoietic

<sup>16</sup>hematopoietic

<sup>17</sup>beta-blocker

<sup>18</sup>other antihypertensive, raas-blocker, beta-blocker, diuretic non k-sparing, diuretic k-sparing, ca-channel blocker, central antihypertensive, antianginal

<sup>19</sup>other antihypertensive, raas-blocker, beta-blocker, diuretic non k-sparing, diuretic k-sparing, ca-channel blocker, central antihypertensive, antianginal
